# Supplementary material for: NPR1 Protein Regulates Pathogenic and Symbiotic Interactions between Rhizobium and Legumes and Non-Legumes
Source: PubMed Central journal article supplement (PMC2793007; doi:10.1371/journal.pone.0008399), 2009-12-21
Supplement: pone.0008399.s004.pdf [file pone.0008399.s004.pdf]

**A**

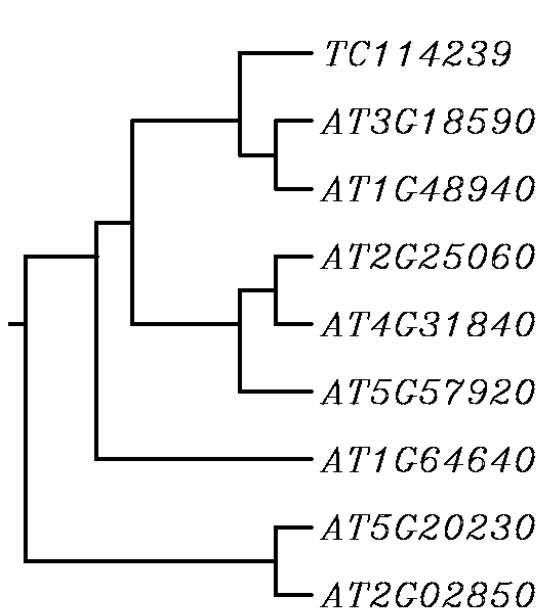

*N-J tree*

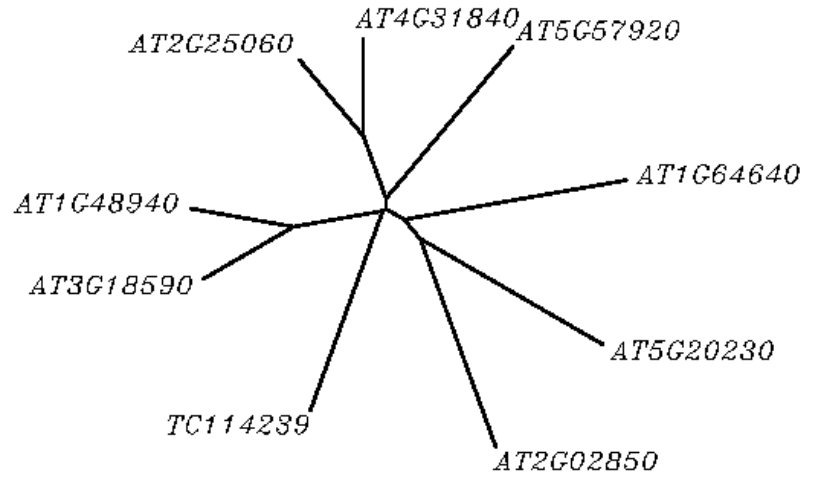

*N-J tree unrooted*

**At5g57920 (*AtENOD20*)**

**B**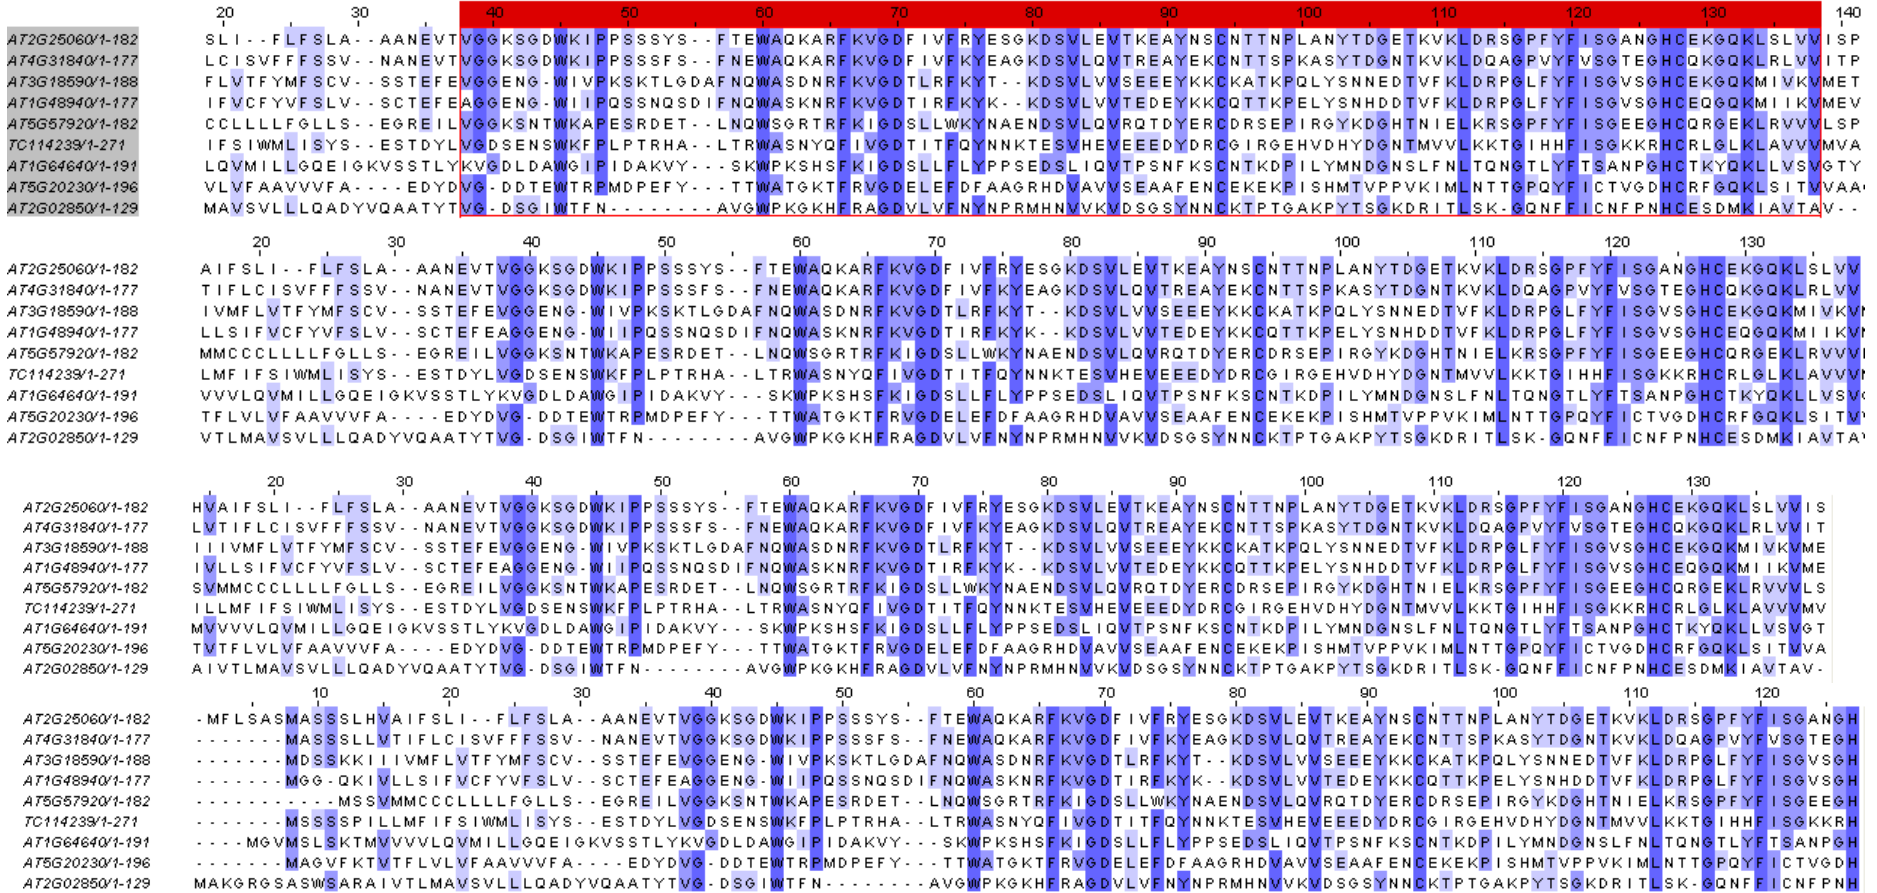**Supplemental Figure S4 B**
