# Supplementary material for: NPR1 Protein Regulates Pathogenic and Symbiotic Interactions between Rhizobium and Legumes and Non-Legumes
Source: PubMed Central journal article supplement (PMC2793007; doi:10.1371/journal.pone.0008399), 2009-12-21
Supplement: pone.0008399.s007.pdf [file pone.0008399.s007.pdf]

**Table I**

| <b>mutation name</b> | <b>gene name</b>                                   | <b>gene number</b>  | <b>gene description</b>                                                                                                                                                                                                                                     | <b>Effect on SA</b>              |
|----------------------|----------------------------------------------------|---------------------|-------------------------------------------------------------------------------------------------------------------------------------------------------------------------------------------------------------------------------------------------------------|----------------------------------|
| <i>nim1/npr1</i>     | noninducible immunity/<br>nonexpressor of PR genes | At1g64280           | Key regulator of the SA-mediated systemic acquired resistance (SAR) pathway. It is similar to NF kappa B, and contains ankyrin repeats; confers resistance to the pathogens <i>P. syringae</i> and <i>Peronospora parasitica</i>                            | insensitive to SA                |
| <i>ndr1</i>          | nonrace-specific disease resistance                | At3G20600           | Required for non-race specific resistance to bacterial and fungal pathogens. Mediates systemic acquired resistance (SAR) response                                                                                                                           | reduced SA level after infection |
| <i>ndn1</i>          | defense no death 1                                 | At5g15410           | A cyclic nucleotide-gated cation channel, conducts K <sup>+</sup> and other cations but excludes Na <sup>+</sup> . Conducts Ca <sup>2+</sup> into cells, involved in the innate immune response to pathogens. Mutants are sensitive to avirulent pathogens. | elevated SA levels               |
| <i>pad4</i>          | phytoalexin deficient 4                            | At3g52430           | Encodes a lipase-like gene important for SA signaling and function in resistance gene-mediated and basal plant disease resistance. PAD4 can interact directly with EDS1, another disease resistance signaling proteins.                                     | reduced SA levels                |
| <i>NahG</i>          | salicylate hydroxylase                             | bacterial transgene | decomposes SA to catechol                                                                                                                                                                                                                                   | reduced SA levels                |
